# Supplementary material
Source: Copernicus journal article supplement (doi:10.5194/egusphere-2026-1767)
Supplement: Supplementary file 1 [file egusphere-2026-1767-supplement.pdf]

# Supplement to: Building blocks of localized storm tracks: revisiting asymmetries between the NH and SH in storm track strength

Chaim I. Garfinkel<sup>1</sup>, Tiffany Shaw<sup>2</sup>, Benny Keller<sup>1</sup>, Edwin P. Gerber<sup>3</sup>, Ian P. White<sup>4</sup>, Martin Jucker<sup>5,6</sup>, Wuhan Ning<sup>1</sup>, Ori Adam<sup>1</sup>, and Siming Liu<sup>2</sup>

<sup>1</sup>Fredy & Nadine Herrmann Institute of Earth Sciences, The Hebrew University of Jerusalem, Israel

<sup>2</sup> Department of the Geophysical Sciences, University of Chicago, Chicago, USA

<sup>3</sup>Courant Institute of Mathematical Sciences, New York University, New York, USA

<sup>4</sup>Bureau of Meteorology, Melbourne, Victoria, Australia

<sup>5</sup>Climate Change Research Centre, University of New South Wales, Sydney, Australia

<sup>6</sup>NSW Bushfire and Natural Hazards Research Centre, Richmond, 2753, Australia

**Correspondence:** Chaim I. Garfinkel (chaim.garfinkel@mail.huji.ac.il)

**Abstract.** The supplemental material includes figures S1 through S7.

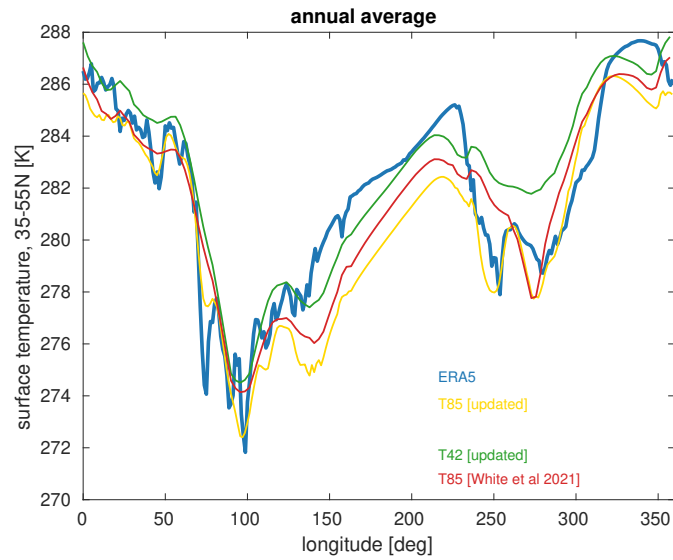

**Figure S1.** Comparison of NH midlatitude surface temperature in ALL3 and in ERA5

## References

- White, I. P., Garfinkel, C. I., Cohen, J., Jucker, M., and Rao, J.: The Impact of Split and Displacement Sudden Stratospheric Warmings on the Troposphere, *Journal of Geophysical Research: Atmospheres*, 126, e2020JD033989, 5 <https://doi.org/https://doi.org/10.1029/2020JD033989>, e2020JD033989 2020JD033989, 2021.

## DJF geopotential height at 321hPa

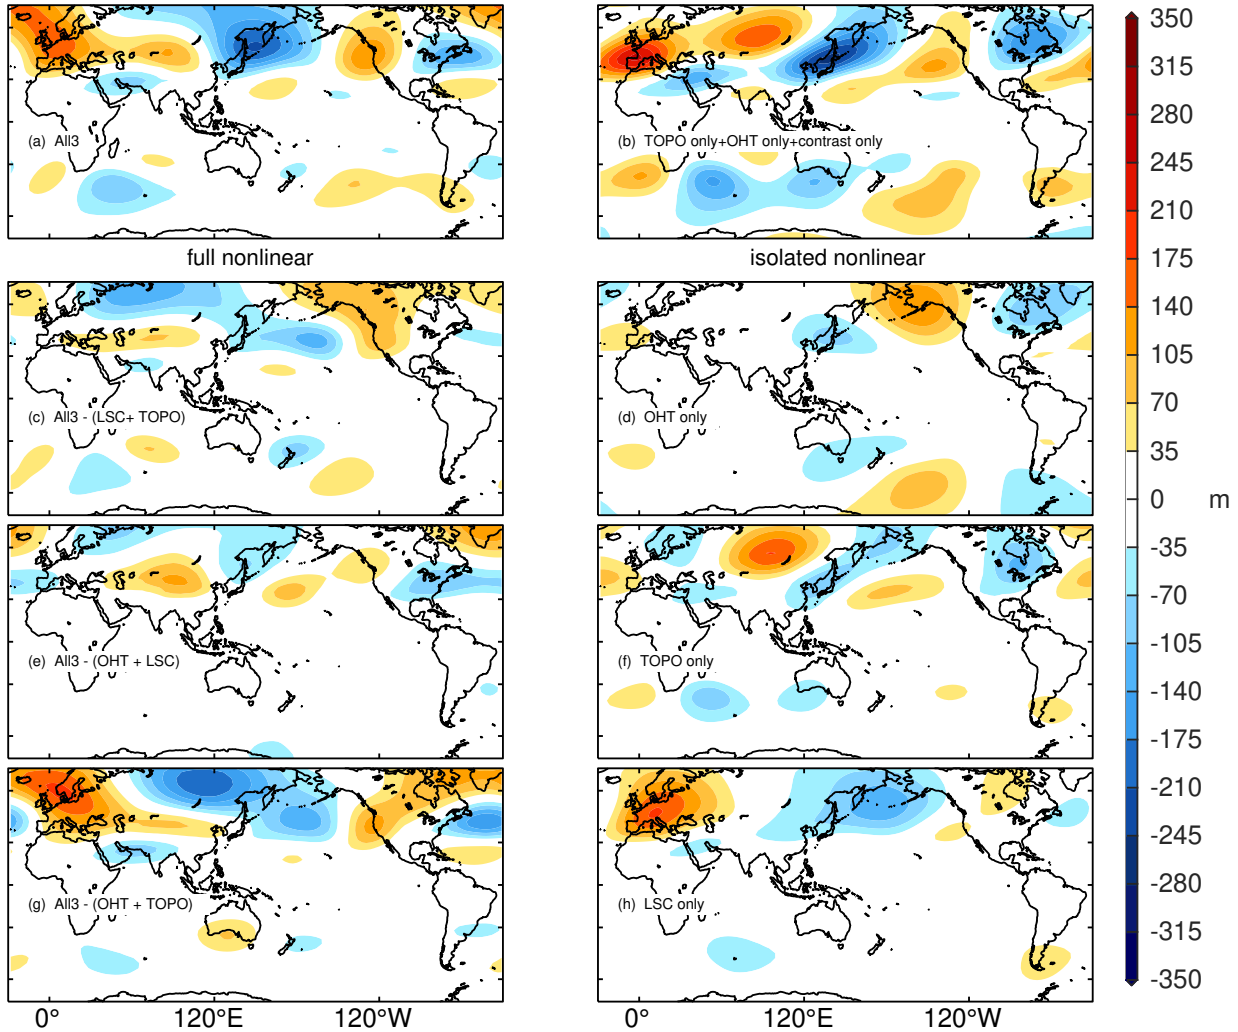

**Figure S2.** (a) Deviation of DJF 321-hPa geopotential height from the zonal average in ALL3. (b) As in (a), but for the sum of integrations with topography only, land–sea contrast only, and ocean heat flux only. (c) The difference between ALL and the integration with land–sea contrast and topography. (d) The integration with only ocean heat flux. (e) The difference between ALL and the integration with ocean heat flux and topography. (f) The integration with only land–sea contrast. (g) The difference between ALL and the integration with ocean heat flux and land–sea contrast. (h) The integration with only topography. The contour interval is 35 m.

annual TKE submonthly pressure weighted

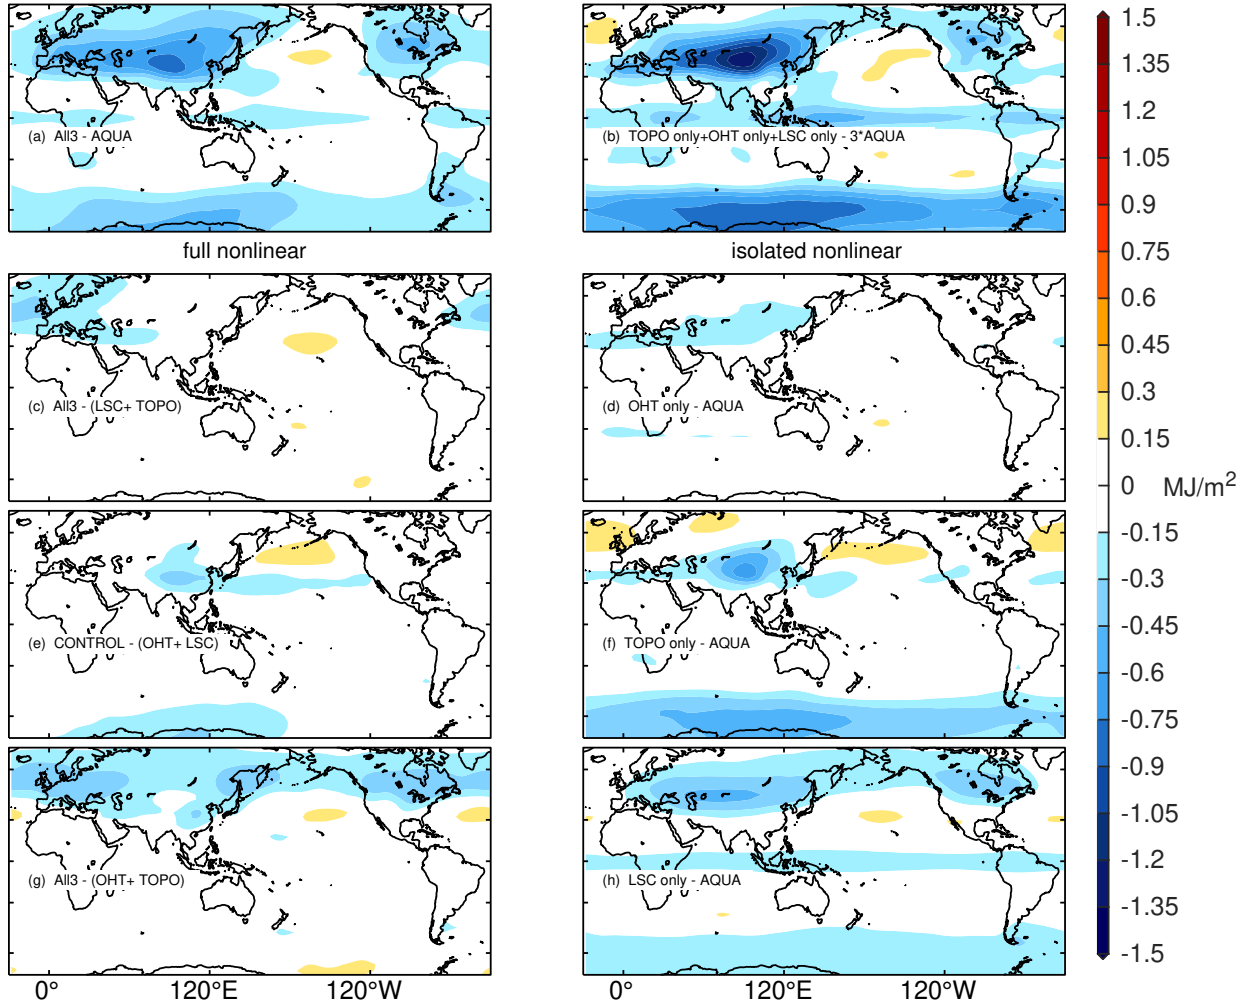

**Figure S3.** As in Figure 6 in the main text but for transient kinetic energy on sub-monthly time scales. Note the difference in color-scale with Figure 6.

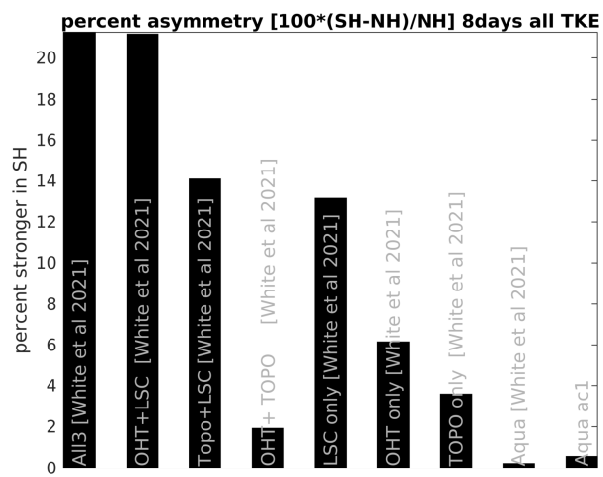

**Figure S4.** As in Figure 7 in the main text but for the White et al. (2021) configuration.

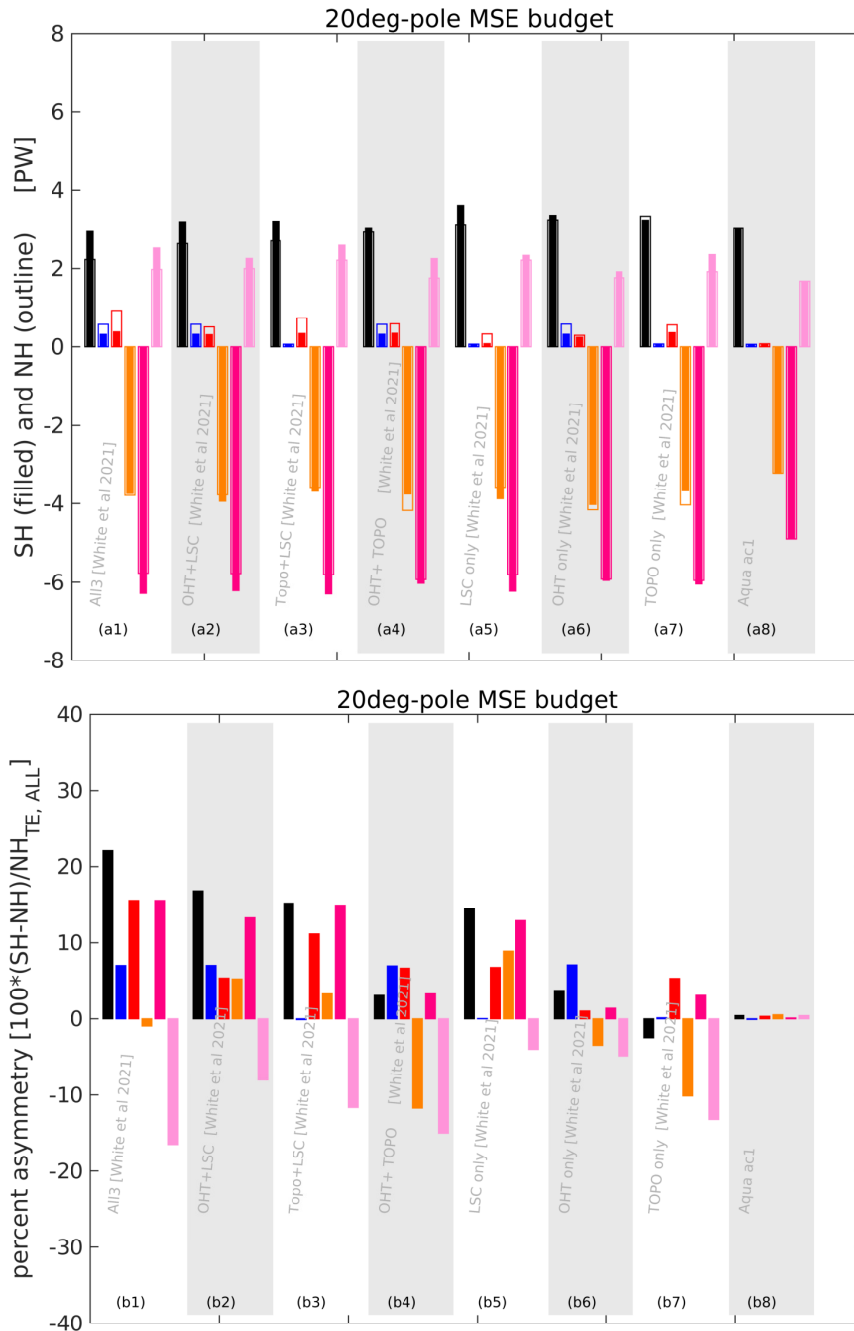

**Figure S5.** As in Figure 9 in the main text but for the White et al. (2021) configuration. First we show SH and NH separately, and then below the percent difference.

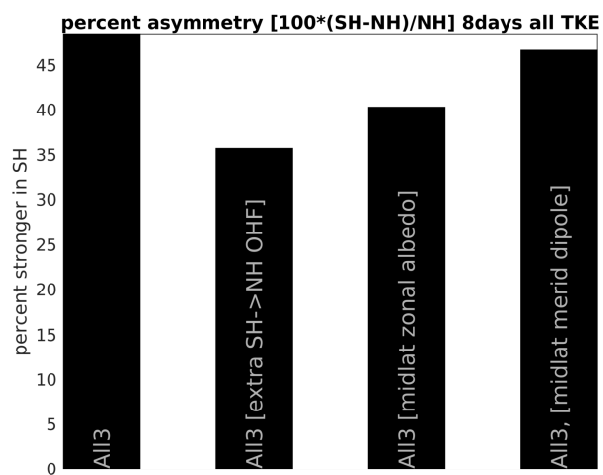

**Figure S6.** As in Figure 7 in the main text but for the sensitivity runs isolating the role of the extra SH to NH ocean heat flux, and changing the midlatitude albedo profile.

### JJAS two-eight days pressure weighted TKE

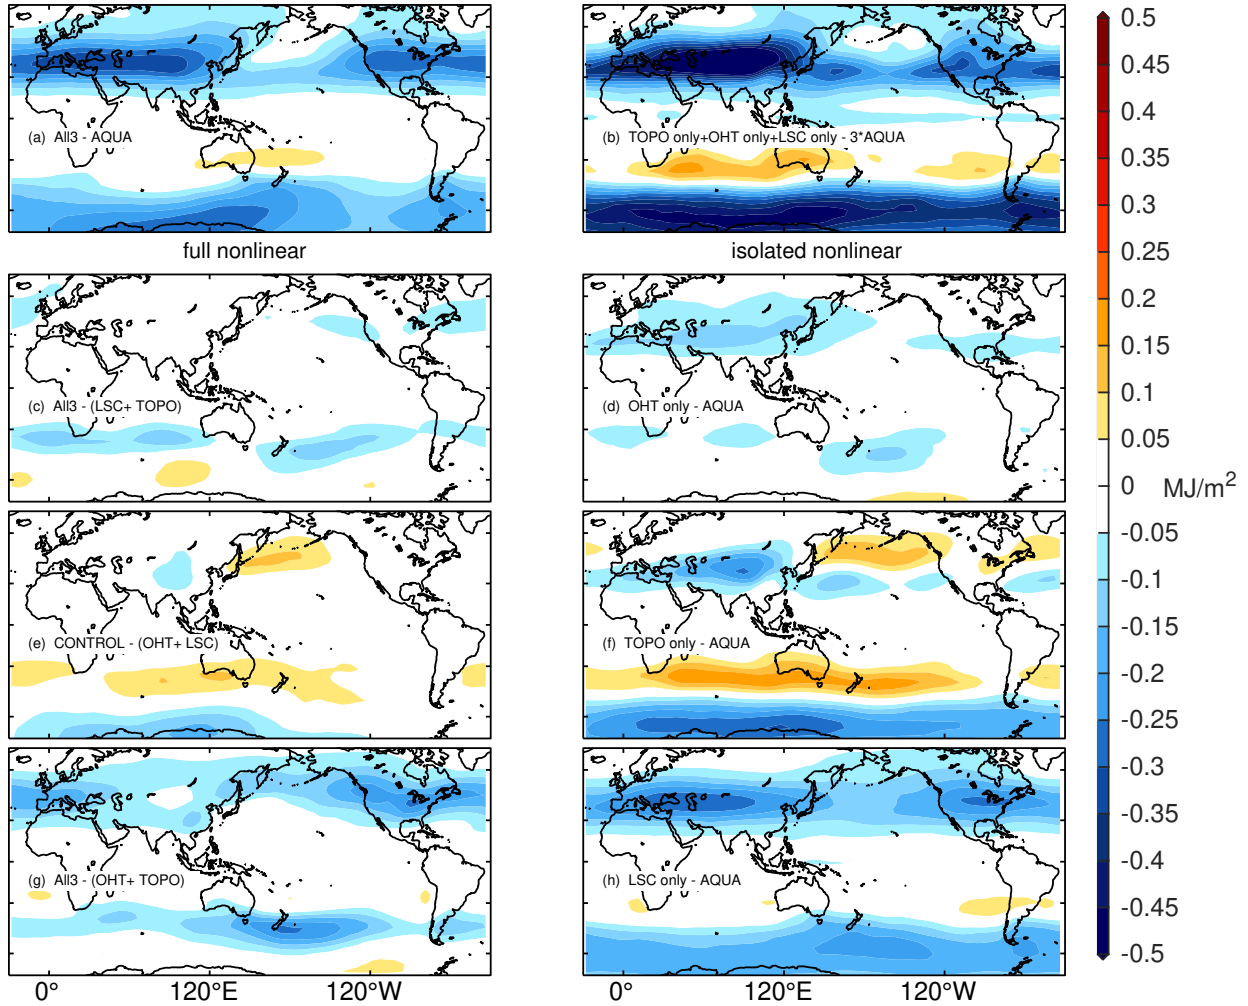

**Figure S7.** As in Figure 6 in the main text but for JJAS.
